# Supplementary material
Source: publisher site journal article supplement (https://www.dovepress.com/article/431438)
Supplement: Supplementary file 1 [file get_supplementary_file.php]

**TableS1** Search equations

| Database |  | Seaech question |
| --- | --- | --- |
| Web of science |  | Search  #1=((((((((ALL=(pregnancy)) OR ALL=( "gestation" )) OR ALL=("maternity" )) or ALL=("maternal Health" )) OR ALL=(postpartum)) OR ALL=(“postpartum period”)) OR ALL=("after delivery")) OR ALL=("after childbirth"))  #2=((((((((((ALL=(Pelvic Girdle Pain )) OR ALL=( "PGP")) OR ALL=(" SPD")) OR ALL=("Symphysis Pubis Dysfunction" )) OR ALL=("pelvic Instability" )) OR ALL=("pelvic Joint Instability" )) OR ALL=("pregnancy-Related Pelvic Pain" )) OR ALL=( "pregnancy Pelvic Pain" )) OR ALL=("Sacroiliac Joint Dysfunction")) OR ALL=( "pelvic Pain during Pregnancy")) OR ALL=("SI Joint Pain" )  #1 AND #2 |
